## Correction: A functional variant of *SMAD4* enhances macrophage recruitment and inflammatory response via TGF- $\beta$ signal activation in Thoracic aortic aneurysm and dissection

Ying Wang<sup>1,\*</sup>, Pei Yin<sup>1,2,\*</sup>, Yi-Huan Chen<sup>1,\*</sup>, Yun-Sheng Yu<sup>1</sup>, Wen-Xue Ye<sup>1</sup>, Hao-Yue Huang<sup>1</sup>, Zhen-Chun Ji<sup>1</sup>, Zhen-Ya Shen<sup>1</sup>

<sup>1</sup>Department of Cardiovascular Surgery of the First Affiliated Hospital and Institute for Cardiovascular Science, Soochow University, Suzhou, Jiangsu, China

<sup>2</sup>Department of Thoracic Surgery, Taizhou People's Hospital, Taizhou, Jiangsu, China

\* Equal contribution

Correspondence to: Zhen-Ya Shen; email: [uuzyshen@aliyun.com](mailto:uuzyshen@aliyun.com)

Original article: *Aging (Albany NY)* 2018; 10: 3683 – 3701.

PMCID: PMC6326647 PMID: 30530919 doi: 10.18632/aging.101662

**This article has been corrected:** The authors made mistake in Supplementary Table 1, the D-dimer, CRP data are same in screening cohort and validation cohort. The correct Supplementary Table 1 is provided below. The authors declare that this correction does not change the results or conclusions of this paper. The authors sincerely apologize for this error.

**Supplementary Table 1. Demographics and clinical features of the TAAD patients involved in this study.**

| Item                                 | Screening cohort<br>n=202 | Validation cohort<br>n=227 | P     |
|--------------------------------------|---------------------------|----------------------------|-------|
| Age                                  | 54.1±14.2                 | 55.2±12.7                  | 0.633 |
| Men(%)                               | 75.2                      | 72.1                       | 0.727 |
| Hypertension(%)                      | 40.1                      | 37.3                       | 0.423 |
| Diabetes(%)                          | 14.4                      | 12.6                       | 0.652 |
| Smoking(%)                           | 52.0                      | 46.5                       | 0.543 |
| Body mass index (kg/m <sup>2</sup> ) | 23.9±4.0                  | 24.5±4.2                   | 0.768 |
| Thoracic aortic diameter(mm)         | 53.2±8.0                  | 52.2±9.7                   | 0.439 |
| D-dimer(μg/ml)                       | 7.66±2.81                 | 7.82±3.98                  | 0.185 |
| CRP(μg/ml)                           | 13.22±6.33                | 12.69±5.17                 | 0.299 |
| HDL-c                                | 1.15±0.29                 | 1.26±0.29                  | 0.071 |
| LDL-c                                | 2.45±0.80                 | 2.39±0.87                  | 0.299 |
